# Supplementary material for: Adipose-Tissue-Derived Mesenchymal Stem Cells Mediate PD-L1 Overexpression in the White Adipose Tissue of Obese Individuals, Resulting in T Cell Dysfunction
Source: MDPI journal article supplement (doi:10.3390/cells10102645), 2021-10-03
Supplement: s1 [file s1]

# Adipose tissue-derived mesenchymal stem cells mediate PD-L1 overexpression in white adipose tissues of obese individuals, resulting in T-cell dysfunction

Assia Eljaafari<sup>1,2,3\*</sup>, Julien Pestel<sup>1,2</sup>, Brigitte Le Magueresse-Battistoni<sup>1,2</sup>, Stephanie Chanon<sup>1,2</sup>, Julia Watson<sup>1,2</sup>, Maud Robert<sup>1,2,4</sup>, Emmanuel Disse<sup>1,2,5</sup>, Hubert Vidal<sup>1,2</sup>

## Supplementary Informations :

### Supplementary Figure S1

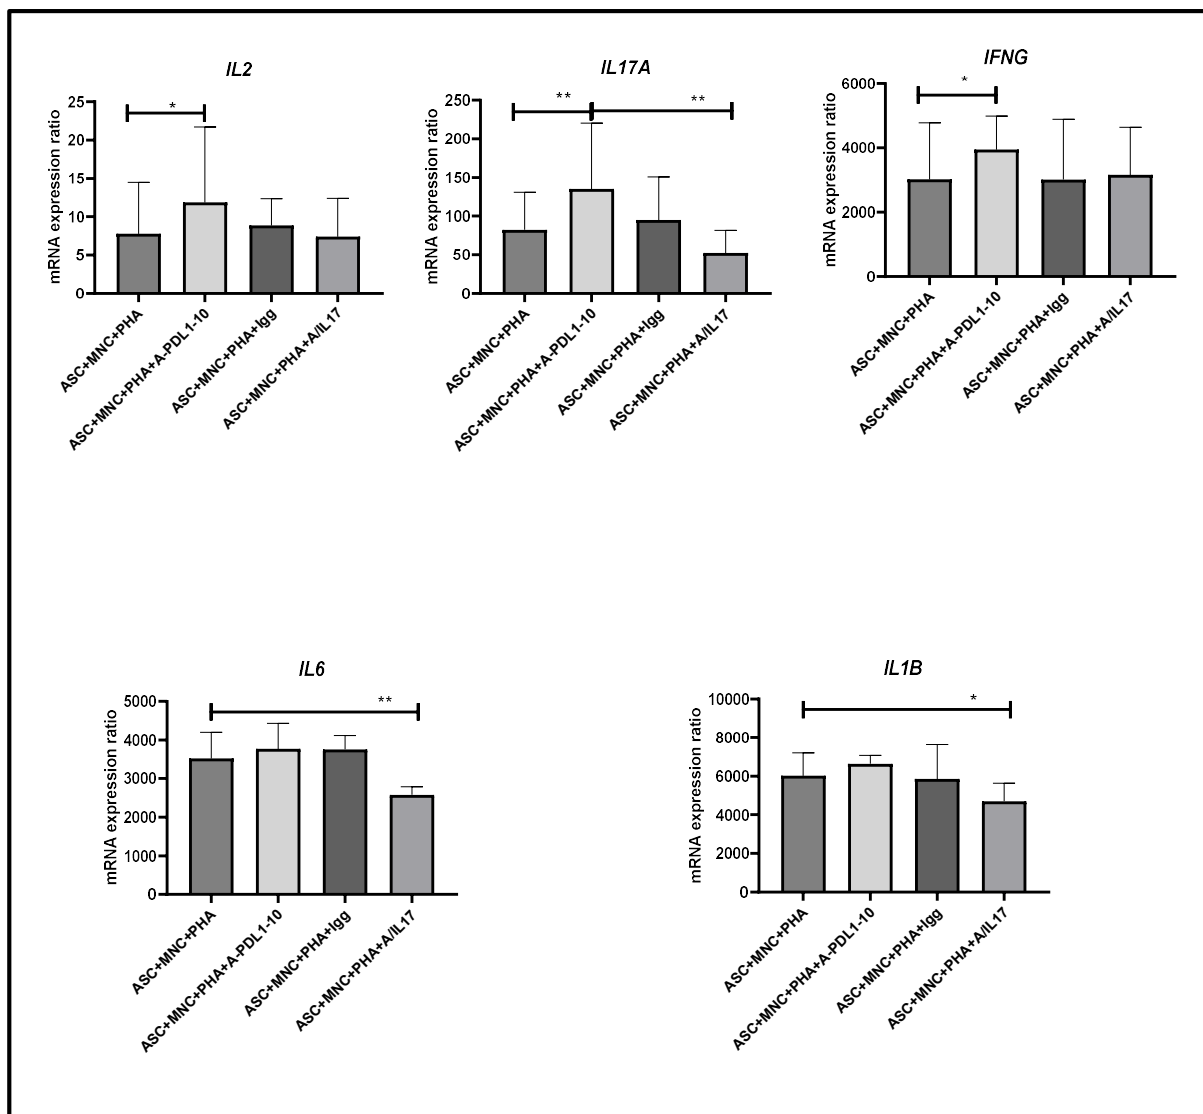

**Figure S1: Specificity of PD-L1 blockade, as compared with IL-17A blockade.** MNC were activated by PHA in the presence of ob-ASC and anti-PD-L1mAbs (R&D Systems, AF156,10

$\mu\text{g/ml}$ ), anti-IL17A Ab (Secukinumab, Novartis Diagnostics, Pharma S.A.S., 92506, Rueil-Malmaison, France;  $50\mu\text{g/ml}$ ) or irrelevant polyclonal goat IgG (Santa-Cruz Biotechnology/INC, Europe; sc-8828,  $10\mu\text{g/ml}$ ). Cytokine mRNA expression levels were measured by RT-qPCR, as mentioned in the Materials and Methods section. Results were expressed as a ratio relative to the *TBP* house-keeping gene. Non parametric *t* tests were used. Data are the mean  $\pm$  SD of  $n=4$ . \*\*, \* represent a *p* value  $<0.01$ , or  $<0.05$ , respectively.

## Supplementary Figure S2

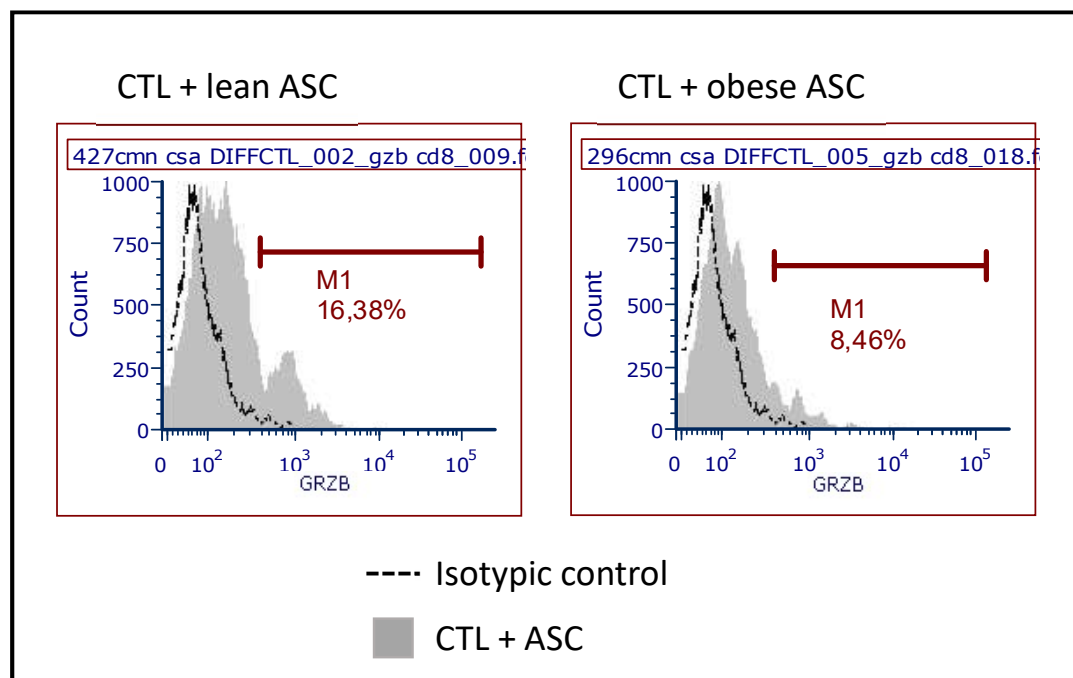

**Figure S2: CTL activity is reduced in the presence of obese versus lean ASC,**

CTL were obtained following co-culture with obese or lean ASC in the presence of PHA for 72 hours, washed away from PHA, rested for one day and expanded in the presence of IL-2 (R&D Systems, Minneapolis, MN, USA;  $20\text{UI/ml}$ ) for 8 additional days. In the meanwhile, lean or obese adipocytes were differentiated from the same ASC used in the co-culture experiments for 8 days, using the protocol described in the Materials and Section of the paper. After 12 days, cells were then restimulated with the differentiated adipocytes for 6 hours before being permeabilized and stained for granzyme B. Intra-cellular secretion of the enzyme was measured by cytofluorometry. This figure is representative of 2 experiments using different ASC

**Table S1** *List of primers used in RT-qPCR*

| Human primers                   |                              |                            |
|---------------------------------|------------------------------|----------------------------|
| Gene                            | Forward primer               | Reverse primer             |
| <i>TBP</i>                      | AGACCATTGCACTTCGTGCC         | CCTGTGCACACCATTITCCC       |
| <i>CD274</i><br>( <i>PDL1</i> ) | CTGCAGGGCATTCCAGAAAG         | G TTCAGCAAATGCCAGTAGG      |
| <i>PDCD1</i>                    | CCCAAGGCGCAGATCAA            | GCACTTCTGCCCTTCTCTCTGT     |
| <i>TNF</i>                      | AGCCCATGTTGTAGCAAACC         | GAGGTACAGGCCCTCTGATG       |
| <i>IL2</i>                      | CAAACCTACCAGGATGCTCA         | GCACTTCCTCCAGAGGTTTG       |
| <i>IFNG</i>                     | GATGACCAGAGCATCCAAAAG        | CATGTATTGCTTTGCGTTG        |
| <i>IL17A</i>                    | ACCAATCCCAAAGGTCCTC          | TGGTAGTCCACGTTCCCATC       |
| <i>IL1B</i>                     | GGCAATGAGGATGACTTGTT         | TGTAGTGGTGGTCGGAGATT       |
| <i>IL6</i>                      | AGCCCTGAGAAAGGAGACATGTAACAAG | TTCTGCAGGAAGTGGATCAGGACTTT |

  

| Murine primers                  |                      |                      |
|---------------------------------|----------------------|----------------------|
| Gene                            | Forward primer       | Reverse primer       |
| <i>Tbp</i>                      | TGGTGTGCACAGGAGCCAAG | TTCACATCACAGCTCCCCAC |
| <i>Cd274</i><br>( <i>Pd11</i> ) | AATGTGACCAGCAGTCTGAG | AAGCACCCAGTGAGTCCTGT |
| <i>Pdcd1</i>                    | CTAGCTGTCTTCTGCTCAAC | GGAAGTCCAGCTCCTCATAG |
